# Supplementary material for: Residual Tumor Volume as Best Outcome Predictor in Low Grade Glioma – A Nine-Years Near-Randomized Survey of Surgery vs. Biopsy
Source: Springer Nature journal article supplement (doi:10.1038/srep32286), 2016-08-30
Supplement: 41598_2016_BFsrep32286_MOESM1_ESM.pdf [file 41598_2016_BFsrep32286_MOESM1_ESM.pdf]

# Supplementary Material

## Residual Tumor Volume as Best Outcome Predictor in Low Grade Glioma – A Nine-Years Near-Randomized Survey of Surgery vs. Biopsy

Roland Roelz<sup>1,2,\*</sup>, David Strohmaier<sup>2</sup>, Ramazan Jabbarli<sup>1,3</sup>, Rainer Kraeutle<sup>4</sup>, Karl Egger<sup>5</sup>,  
Volker A. Coenen<sup>2</sup>, Astrid Weyerbrock<sup>1</sup>, Peter C. Reinacher<sup>2</sup>

<sup>1</sup>Department of Neurosurgery, Medical Center – University of Freiburg, Breisacher Str. 64, 79106 Freiburg, Germany (RR, DS, AW, MM)

<sup>2</sup>Department of Stereotactic and Functional Neurosurgery, Medical Center – University of Freiburg, Breisacher Str. 64, 79106 Freiburg (PCR, VAC)

<sup>3</sup>Department of Neurosurgery, University Hospital Essen, Hufelandstr. 55, 45147, Germany (RJ)

<sup>4</sup>Department of Nursing-IT, Medical Center – University of Freiburg, Hugstetter Str. 55, 79106 Freiburg (RK)

<sup>5</sup>Department of Neuroradiology, Medical Center – University of Freiburg, Breisacher Str. 64, 79106 Freiburg, Germany (KE)

### \*Corresponding Author:

Roland Roelz, MD

Department of Neurosurgery, University Medical Center Freiburg

Breisacher Strasse 64, 79106 Freiburg, Germany

e-mail: [roland.roelz@uniklinik-freiburg.de](mailto:roland.roelz@uniklinik-freiburg.de)

Phone: 0049 – 761 270 50010, Fax: 0049 – 761 270 93090

### Running Title:

Near-Randomization of Surgery vs. Biopsy in Low Grade Glioma

**Supplementary Figure 1:**

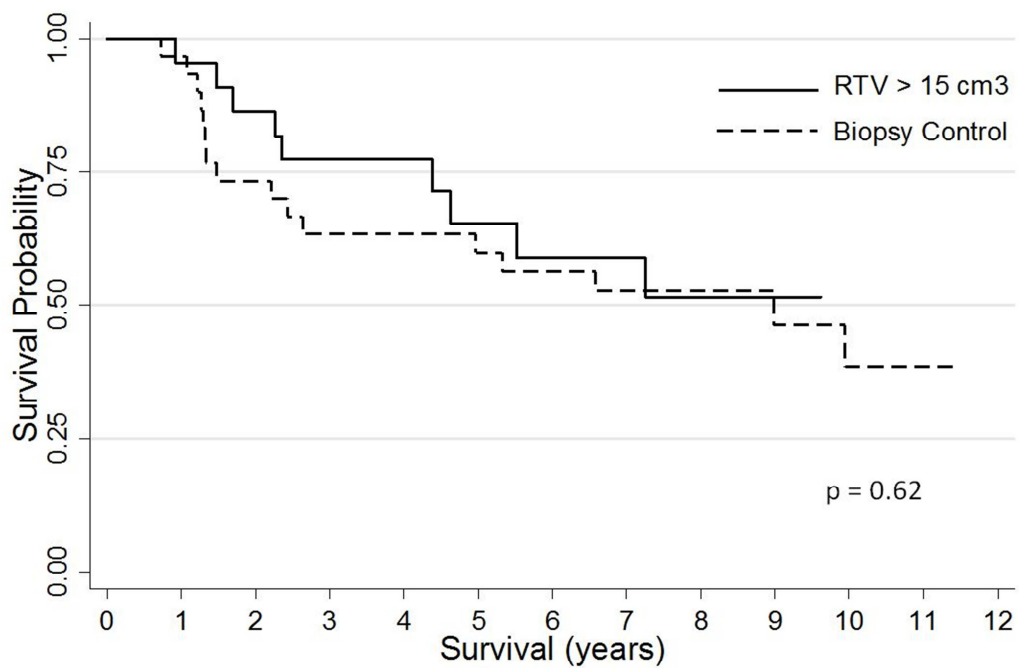

|                           |                 |    |    |    |    |    |    |    |    |   |   |   |   |
|---------------------------|-----------------|----|----|----|----|----|----|----|----|---|---|---|---|
| RTV > 15cm <sup>3</sup> : | 22              | 22 | 20 | 17 | 14 | 11 | 10 | 9  | 8  | 6 | 0 |   |   |
| Biopsy Control:           | 30              | 30 | 23 | 20 | 20 | 18 | 17 | 16 | 13 | 8 | 6 | 2 | 0 |
|                           | Numbers-at-Risk |    |    |    |    |    |    |    |    |   |   |   |   |

Overall survival of low grade glioma patients with a RTV of more than 15cm<sup>3</sup> compared to a matching control group with initial biopsy ("Biopsy Control"). No difference in overall survival was observed between both groups.

**Supplementary Figure 2:**

| Histology         | Early RTX       |     | Total |
|-------------------|-----------------|-----|-------|
|                   | no              | yes |       |
| Oligodendroglioma | 15              | 1   | 16    |
| Oligoastrocytoma  | 42              | 1   | 43    |
| Astrocytoma       | 34              | 22  | 56    |
| Total             | 91              | 24  | 115   |
| Pearson $\chi^2$  | 25.0, p < 0.001 |     |       |

Early radiotherapy (within 6 months of diagnosis) was predominantly applied in patients with astrocytoma histology.

**Supplementary Table 1:**

|                                           | Initial Management         |                                           |                                           | Univariate Statistics                             |
|-------------------------------------------|----------------------------|-------------------------------------------|-------------------------------------------|---------------------------------------------------|
|                                           | Biopsy                     | Resection                                 |                                           |                                                   |
| <u>Patient characteristics</u>            |                            | Residual Tumor Volume < 15cm <sup>3</sup> | Residual Tumor Volume > 15cm <sup>3</sup> |                                                   |
| Number of patients                        | 77                         | 27                                        | 22                                        |                                                   |
| Year of first diagnosis, (IQR), y         | 2006 (2005-2008)           | 2009 (2006-2010)                          | 2007 (2006-2011)                          | <b>p = 0.0104</b>                                 |
| Sex                                       |                            |                                           |                                           | $\chi^2$ (2, N=126) = 1.7<br>p = 0.42             |
| Male                                      | 50 (65%)                   | 21 (78%)                                  | 16 (73%)                                  |                                                   |
| Female                                    | 27 (35%)                   | 6 (22%)                                   | 6 (27%)                                   |                                                   |
| Age at diagnosis, median (IQR), y         | 44 (35-60)                 | 39 (27-45)                                | 42 (36-50)                                | p = 0.13                                          |
| Follow-up, median, (IQR), y               | 4.3 (2.1-8.2)              | 5.8 (4.2-8.6)                             | 4.7 (2.4-9.4)                             | p = 0.103                                         |
| Status                                    |                            |                                           |                                           | $\chi^2$ (4, N=126) = 13.8<br><b>p = 0.008</b>    |
| Dead                                      | 43 (56%)                   | 4 (15%)                                   | 9 (41%)                                   |                                                   |
| Alive                                     | 31 (40%)                   | 21 (78%)                                  | 12 (55%)                                  |                                                   |
| Lost to follow-up                         | 3 (4%)                     | 2 (7%)                                    | 1 (5%)                                    |                                                   |
| Overall survival, median, y               | 6.7                        | Not reached                               | 10.6                                      | <b>p = 0.0025</b>                                 |
| 5-year survival rate (%)                  | 54%                        | 96%                                       | 64%                                       |                                                   |
| 10-year survival rate (%)                 | 38%                        | 77%                                       | 58%                                       |                                                   |
| Preoperative KPS, mean (SD), %            | 90 (8.0)                   | 93 (9.9)                                  | 90 (6.5)                                  | <b>p = 0.032</b>                                  |
| Charlson comorbidity index, mean (SD)     | 0.32 (1.1)                 | 0.41 (0.7)                                | 0.32 (0.8)                                | p = 0.28                                          |
| Initial symptoms                          |                            |                                           |                                           | $\chi^2$ (6, N=126) = 3.2<br>p = 0.79             |
| None (incidental)                         | 5 (6%)                     | 1 (4%)                                    | 1 (5%)                                    |                                                   |
| Seizure                                   | 49 (64%)                   | 18 (67%)                                  | 16 (7%)                                   |                                                   |
| Headache                                  | 10 (13%)                   | 1 (4%)                                    | 5 (23%)                                   |                                                   |
| Neurological deficit                      | 23 (30%)                   | 8 (30%)                                   | 7 (32%)                                   |                                                   |
| Pignatti score, mean (SD)                 | 1.8 (1.0)                  | 1.4 (1.2)                                 | 2.0 (1.3)                                 | p = 0.105                                         |
|                                           |                            |                                           |                                           |                                                   |
| <u>Tumor Characteristics</u>              |                            |                                           |                                           |                                                   |
| Histopathology                            |                            |                                           |                                           | $\chi^2$ (4, N=126) = 10.1<br><b>p = 0.039</b>    |
| Astrocytoma WHO°II                        | 44 (57%)                   | 10 (37%)                                  | 8 (36%)                                   |                                                   |
| Oligoastrocytoma WHO°II                   | 27 (35%)                   | 9 (33%)                                   | 10 (45%)                                  |                                                   |
| Oligodendroglioma WHO°II                  | 6 (8%)                     | 8 (30%)                                   | 4 (18%)                                   |                                                   |
| Tumor size                                |                            |                                           |                                           |                                                   |
| Maximum diameter, mean, (SD), mm          | 5.0 (1.9)                  | 4.8 (2.2)                                 | 7.0 (1.8)                                 | <b>p &lt; 0.001</b>                               |
| Tumor volume, mean, (SD), mm <sup>3</sup> | 54 (53)                    | 41 (36)                                   | 117 (59)                                  | <b>p &lt; 0.001</b>                               |
| Eloquent location (Sawaya-Score)          |                            |                                           |                                           | $\chi^2$ (4, N=126) = 26.5<br><b>p &lt; 0.001</b> |
| 1                                         | 5 (6%)                     | 8 (30%)                                   | 0 (0%)                                    |                                                   |
| 2                                         | 50 (65%)                   | 17 (63%)                                  | 8 (36%)                                   |                                                   |
| 3                                         | 32 (42%)                   | 2 (7%)                                    | 14 (64%)                                  |                                                   |
| Bilateral tumor extension                 | 4 (5%)                     | 1 (4%)                                    | 2 (9%)                                    | $\chi^2$ (2, N=126) = 0.72<br>p = 0.70            |
| Left Hemisphere                           | 45 (58%)                   | 15 (56%)                                  | 10 (45%)                                  | $\chi^2$ (2, N=126) = 0.82<br>p = 0.66            |
| Preoperative contrast enhancement         | 14 / 73 <sup>s</sup> (19%) | 6 / 24 <sup>s</sup> (25%)                 | 7 / 17 <sup>s</sup> (41%)                 | $\chi^2$ (2, N=) = 4.0<br>p = 0.14                |
| Location of tumor                         |                            |                                           |                                           | $\chi^2$ (8, N=126) = 14.4<br>p = 0.073           |
| Frontal                                   | 29 (38%)                   | 14 (52%)                                  | 8 (36%)                                   |                                                   |
| Temporal                                  | 10 (13%)                   | 8 (30%)                                   | 3 (14%)                                   |                                                   |
| Parietal                                  | 7 (9%)                     | 2 (7%)                                    | 0 (0%)                                    |                                                   |
| Insula                                    | 20 (26%)                   | 2 (7%)                                    | 9 (41%)                                   |                                                   |
| Other                                     | 11 (14%)                   | 1 (4%)                                    | 2 (9%)                                    |                                                   |
| <u>Surgical Characteristics</u>           |                            |                                           |                                           |                                                   |
| Number of tumor resections                |                            |                                           |                                           |                                                   |
| 0 (Biopsy only)                           | 55 (71%)                   | -                                         | -                                         |                                                   |
| 1                                         | 13 (17%)                   | 17 (63%)                                  | 8 (4%)                                    | $\chi^2$ (4, N=) = 5.6                            |

|                                      |                    |                   |                   |                                      |
|--------------------------------------|--------------------|-------------------|-------------------|--------------------------------------|
| 2                                    | 6 (8%)             | 9 (33%)           | 12 (55%)          | p = 0.23                             |
| >2                                   | 3 (4%)             | 1 (4%)            | 2 (9%)            |                                      |
| Post operative deficits <sup>†</sup> | 0 (0%)             | 5 (19%)           | 2 (9%)            |                                      |
| Post-operative deficits > 6 months   | 0 (0%)             | 2 (7%)            | 2 (9%)            |                                      |
| <b><u>Ajuvant Therapy</u></b>        |                    |                   |                   |                                      |
|                                      | Available:66 (86%) | Available: 27 (%) | Available: 22 (%) | $\chi^2 (8, N=) = 16.7$<br>p = 0.033 |
| None                                 | 22 (32%)           | 14 (52%)          | 9 (41%)           |                                      |
| Early radiotherapy                   | 22 (32%)           | 1 (4%)            | 1 (5%)            |                                      |
| Ever radiotherapy                    | 37 (56%)           | 11 (41%)          | 10 (45%)          |                                      |
| Early chemotherapy                   | 19 (29%)           | 4 (15%)           | 1 (5%)            |                                      |
| Ever chemotherapy                    | 41 (62%)           | 11 (41%)          | 12 (55%)          |                                      |

§ Number of available pre-operative contrast-enhanced MRI

† Deficits after first intervention (biopsy or 1<sup>st</sup> surgery), permanent deficit was defined as a new deficit persisting > 6 months

### Supplementary Table 2:

|                                           | Biopsy Matching Group | Resection Residual Tumor Volume > 15cm <sup>3</sup> | Univariate Statistics                |
|-------------------------------------------|-----------------------|-----------------------------------------------------|--------------------------------------|
| <b><u>Patient characteristics</u></b>     |                       |                                                     |                                      |
| Number of patients                        | 30                    | 22                                                  |                                      |
| Year of first diagnosis, mean (SD)        | 2005 (2005-2007)      | 2007 (2006-2011)                                    | <b>0.003</b>                         |
| Sex                                       |                       |                                                     | p = 0.76                             |
| Male                                      | 20 (67%)              | 16 (%)                                              |                                      |
| Female                                    | 10 (33%)              | 6 (%)                                               |                                      |
| Age at diagnosis, median (IQR), y         | 44 (36-54)            | 42 (36-50)                                          | p = 0.52                             |
| Follow-up, median (IQR), y                | 6.0 (1.5-9.3)         | 4.7 (2.4-9.4)                                       | p = 0.82                             |
| Status                                    |                       |                                                     | $\chi^2 (2, N=52) = 1.3$<br>p = 0.53 |
| Dead                                      | 17 (57%)              | 9 (%)                                               |                                      |
| Alive                                     | 12 (40%)              | 12 (%)                                              |                                      |
| Lost to follow-up                         | 1 (3%)                | 1 (%)                                               |                                      |
| Overall Survival, median, y               | 9.1                   | 10.6                                                | p = 0.64                             |
| 5-year survival rate (%)                  |                       |                                                     |                                      |
| 10-year survival rate (%)                 |                       |                                                     |                                      |
| Preoperative KPS, mean (SD), %            | 88 (9.1)              | 90 (6.5)                                            | p = 0.50                             |
| Charlson comorbidity index, mean (SD)     | 0.17 (53)             | 0.32 (0.8)                                          | p = 0.41                             |
| Initial symptoms                          |                       |                                                     | $\chi^2 (3, N=52) = 3.4$<br>p = 0.34 |
| None (incidental)                         | 0 (0%)                | 1 (%)                                               |                                      |
| Seizure                                   | 22 (73%)              | 16 (%)                                              |                                      |
| Headache                                  | 2 (7%)                | 5 (%)                                               |                                      |
| Neurological deficit                      | 10 (30%)              | 7 (%)                                               |                                      |
| Pignatti score, mean (SD)                 | 2.1 (1.1)             | 2.0 (1.3)                                           | p = 0.79                             |
| <b><u>Tumor Characteristics</u></b>       |                       |                                                     |                                      |
| Histopathology                            |                       |                                                     | $\chi^2 (2, N=52) = 2.3$<br>p = 0.31 |
| Astrocytoma WHO°II                        | 16 (53%)              | 8 (%)                                               |                                      |
| Oligoastrocytoma WHO°II                   | 12 (40%)              | 10 (%)                                              |                                      |
| Oligodendroglioma WHO°II                  | 2 (7%)                | 4 (%)                                               |                                      |
| Tumor size                                |                       |                                                     |                                      |
| Maximum diameter, mean, (SD), mm          | 65 (14)               | 70 (18)                                             | p = 0.18                             |
| Tumor volume, mean, (SD), mm <sup>3</sup> | 91 (43)               | 117 (59)                                            | p = 0.10                             |

|                                        |                           |                         |                                         |
|----------------------------------------|---------------------------|-------------------------|-----------------------------------------|
| Eloquent location (Sawaya-Score)       |                           |                         |                                         |
| 1                                      | 0 (0%)                    | 0 (0%)                  | $\chi^2 (1, N=52) = 0.96$<br>$p = 0.62$ |
| 2                                      | 15 (50%)                  | 8 (%)                   |                                         |
| 3                                      | 15 (50%)                  | 14 (%)                  |                                         |
| Bilateral tumor extension              | 3 (10%)                   | 2 (%)                   | $p = 1.00$                              |
| Left Hemisphere                        | 16 (53%)                  | 10 (%)                  | $p = 0.77$                              |
| Preoperative contrast enhancement      | 9 / 28 <sup>§</sup> (32%) | 7 / 17 <sup>§</sup> (%) | $p = 0.19$                              |
| Location of tumor                      |                           |                         | $\chi^2 (4, N=126) = 4.1$<br>$p = 0.40$ |
| Frontal                                | 13 (43%)                  | 8 (%)                   |                                         |
| Temporal                               | 1 (3%)                    | 3 (%)                   |                                         |
| Parietal                               | 1 (3%)                    | 0 (%)                   |                                         |
| Insula                                 | 9 (30%)                   | 9 (%)                   |                                         |
| Other                                  | 6 (20%)                   | 2 (%)                   |                                         |
| Anaplastic transformation <sup>#</sup> | 32 / 42 (76%)             | 21 / 25 (84%)           | $p = 0.54$                              |
| <b>Surgical Characteristics</b>        |                           |                         |                                         |
| Number of tumor resections             |                           |                         |                                         |
| 0 (Biopsy only)                        | 22 (73%)                  | -                       | $\chi^2 (2, N=30) = 0.68$<br>$p = 0.71$ |
| 1                                      | 4 (13%)                   | 8 (%)                   |                                         |
| 2                                      | 3 (10%)                   | 12 (%)                  |                                         |
| >2                                     | 1 (3%)                    | 2 (%)                   |                                         |
| Post operative deficits <sup>†</sup>   | 0 (0%)                    | 2 (9%)                  | $p = 0.19$                              |
| Post-operative deficits > 6 months     | 0 (0%)                    | 2 (9%)                  | $p = 0.19$                              |
| <b>Adjuvant Therapy</b>                | Available: 27 (%)         | Available: 22 (%)       |                                         |
| None                                   | 7 (26%)                   | 9 (41%)                 | $\chi^2 (4, N=49) = 8.7$<br>$p = 0.07$  |
| Early radiotherapy                     | 9 (33%)                   | 1 (5%)                  |                                         |
| Ever radiotherapy                      | 14 (52%)                  | 10 (45%)                |                                         |
| Early chemotherapy                     | 8 (30%)                   | 1 (5%)                  |                                         |
| Ever chemotherapy                      | 17 (63%)                  | 12 (55%)                |                                         |

<sup>§</sup> Number of available pre-operative contrast-enhanced MRI

<sup>†</sup> Deficits after first intervention (biopsy or 1<sup>st</sup> surgery), permanent deficit was defined as a new deficit persisting > 6 months
